# Supplementary material for: Multispecies probiotics complex improves bile acids and gut microbiota metabolism status in an in vitro fermentation model
Source: Front Microbiol. 2024 Feb 20;15:1314528. doi: 10.3389/fmicb.2024.1314528 (PMC10913090; doi:10.3389/fmicb.2024.1314528)
Supplement: Supplementary file 1 [file Table_1.XLSX]

## Sheet: shee1
Index	Compounds	Class	HB_CK1	HB_CK2	HB_CK3	HB1	HB2	HB3	VIP	Pvalue	FDR	Fold_Change	Log2FC	Type
12-oxo-CDCA	12-Oxochenodeoxycholic acid	BAs	0.0	0.0	0.0	94.1852	47.3222	64.2826	1.008462316541282	0.03764433603697673	0.045907726874361864	Inf	Inf	up
3-oxo-CA	3-Oxocholic acid	BAs	0.0	0.0	0.0	0.871086	0.5110239999999999	0.684034	1.037486983920855	0.022037932326510787	0.0412812082538172	Inf	Inf	up
3-oxo-DCA	3-oxodeoxycholic acid	BAs	0.758412	0.808046	1.2511299999999999	6.9680800000000005	4.0666	5.41308	1.0096926200967742	0.028896845777672042	0.0412812082538172	5.837531959960081	2.5453585434689283	up
3β-CA	3β-Cholic Acid	BAs	0.0	0.0	0.0	1.3700219999999999	1.093802	1.206134	1.0684210970653332	0.004270459535795486	0.021710337517170105	Inf	Inf	up
3β-UDCA	3β-Ursodeoxycholic Acid	BAs	0.0	0.0	0.0	1.062108	0.89589	1.424772	1.0420636894452295	0.018641591219465983	0.038836648373887464	Inf	Inf	up
6-ketoLCA	5-β-Cholanic Acid-3α-ol-6-one	BAs	0.0	0.0	0.0	12.97906	10.36712	11.30932	1.0681430978820659	0.004342067503434021	0.021710337517170105	Inf	Inf	up
7-KDCA	7-Ketodeoxycholic acid	BAs	8.7499	8.525160000000001	9.31104	203.40599999999998	112.8746	167.40099999999998	1.0262944221897758	0.02855075471248041	0.0412812082538172	18.193025678832168	4.185313592183755	up
7-KLCA	7-ketolithocholic acid	BAs	3.2494	5.2702800000000005	4.1121	51.4184	36.491	50.2118	1.0543693298879047	0.011903269602455035	0.031324393690671144	10.934420960466378	3.4508049184208556	up
CA	cholic acid	BAs	141.0844	141.09	173.7262	40575.4	22264.0	35208.2	1.0301192813559423	0.026794374032046743	0.0412812082538172	215.0635467468128	7.748619198569057	up
CA-3S	Cholic Acid 3 Sulfate Sodium Salt	BAs	0.0	0.0	0.0	96.3724	52.5714	78.0038	1.0291568887513458	0.027041312271484097	0.0412812082538172	Inf	Inf	up
CDCA	Chenodeoxycholic acid	BAs	92.2084	121.853	135.599	27546.2	20185.2	26375.2	1.0623602598293418	0.008516102068863253	0.026612818965197665	211.9387840315918	7.727503809623005	up
CDCA-3Gln	Chenodeoxycholic acid-3-β-D-glucuronide	Glucuronide	3.8562	3.64972	4.76894	10.50204	9.30992	9.19938	1.044122881109731	5.959201831475399e-4	0.021710337517170105	2.3634762433135696	1.2409103633951228	up
CDCA-3S	chenodeoxycholic acid3-sulfate disodium salt	BAs	4.17508	4.4485	5.59162	378.63	196.2784	345.838	1.0195936398976502	0.03280006983955576	0.043128756346947794	64.77196240643818	6.017297549192006	up
DCA	Deoxycholic acid	BAs	8.52926	8.12964	9.47288	146.6404	95.9192	122.2252	1.0471120674981371	0.016361693846482173	0.03556889966626559	13.959431772347692	3.8031683118002086	up
DCA-3-O-S	Deoxycholic Acid 3-O-Sulfate Disodium Salt	BAs	0.0	0.0	0.0	2.64182	1.224176	2.11412	1.0056805817528913	0.04046905154681346	0.04817744231763507	Inf	Inf	up
GCA	Glycocholic acid	Glyco	74864.0	77889.6	88226.6	18.8185	3.21012	7.74292	1.078717525458115	0.0025272312660566476	0.021710337517170105	1.235435110436459e-4	-12.982693142504772	down
GCDCA	Glycochenodeoxycholic acid	Glyco	13663.76	15014.06	17841.42	0.0	0.0	0.0	1.0768766329953825	0.006241812902684599	0.024006972702633075	0	-Inf	down
GCDCA-3S	Glycochenodeoxycholic Acid 3 Sulfate Disodium Salt	BAs	200.578	224.398	271.58799999999997	0.0	0.0	0.0	1.075360760284192	0.00797919971376166	0.026612818965197665	0	-Inf	down
GHCA	Glycohyocholic acid	Glyco	45.7622	48.9338	54.915	0.0	0.0	0.0	1.0785820861808073	0.002882651907870867	0.021710337517170105	0	-Inf	down
GHDCA	Glycohyodeoxycholic Acid	BAs	359.32199999999995	421.214	438.5	0.0	0.0	0.0	1.0761012551130142	0.003480479520918528	0.021710337517170105	0	-Inf	down
GLCA	Glycolithocholic acid	Glyco	3.2690799999999998	3.92596	6.07758	0.0	0.0	0.0	1.0409661018727105	0.03484252145765764	0.043553151822072055	0	-Inf	down
GLCA-3S	glycolithocholic acid-3-sulfate	Glyco	45.1306	47.3698	62.305	0.0	0.0	0.0	1.07268115281789	0.010737152658649619	0.030360059080076555	0	-Inf	down
GUDCA	Glycoursodeoxycholic acid	Glyco	335.80199999999996	380.564	432.654	0.0	0.0	0.0	1.0770767923559192	0.005296514309476584	0.0220688096228191	0	-Inf	down
HCA	hyocholic acid	BAs	7.7183600000000006	8.20158	8.210239999999999	344.74	228.13	310.782	1.0522164589179195	0.0142928207569699	0.0340305256118331	36.62019926913102	5.194567736481513	up
HDCA	Hyodeoxycholic acid	BAs	10.52084	8.92154	9.83038	138.145	92.6972	112.3902	1.0491213838432587	0.015352278761513733	0.034891542639803944	11.725317325732181	3.551555062239124	up
LCA	Lithocholic acid	BAs	1.831248	0.846826	1.0566280000000001	8.593580000000001	6.15676	9.35168	1.043903570505128	0.013347079550635424	0.03336769887658856	6.453532303246685	2.6900890274319385	up
LCA-3S	lithocholic acid-3-sulfate	BAs	0.568434	0.578328	0.70973	24.5202	13.525520000000002	22.5356	1.0268347777342617	0.028573964281657604	0.0412812082538172	32.632147081700325	5.028222009752447	up
MDCA	murideoxycholic acid	BAs	0.0	0.0	0.0	5.9383	4.303059999999999	7.7763800000000005	1.028546669766944	0.02678649179508899	0.0412812082538172	Inf	Inf	up
TCA	Taurocholic acid	Tauro	20481.2	19444.08	22040.2	47.2394	9.4001	25.8132	1.076823703084429	0.0013323749252264672	0.021710337517170105	0.001330623114676107	-9.553682284098644	down
TCDCA	Taurochenodeoxycholic acid	Tauro	8857.72	9707.16	12020.54	6.9916	2.13184	3.88496	1.0750043325642147	0.008490690001913544	0.026612818965197665	4.25313760608813e-4	-11.199184846850201	down
TDCA	Taurodeoxycholic acid	Tauro	94.6992	91.1712	111.7782	0.0	0.42040200000000005	0.0	1.0775198516351565	0.004084656466388223	0.021710337517170105	0.0014124104732896442	-9.467624860556857	down
THDCA	Taurohyodeoxycholic Acid (sodium salt)	Tauro	132.9504	132.9948	150.1694	0.0	0.0	0.0	1.0783559564713545	0.0017035726605097571	0.021710337517170105	0	-Inf	down
TLCA	taurolithocholic acid	Tauro	5.28454	5.492380000000001	7.28372	0.0	0.0	0.0	1.072417067291147	0.01092962126882756	0.030360059080076555	0	-Inf	down
TUDCA	Tauroursodeoxycholic acid	Tauro	103.7462	107.7456	130.126	1.381936	0.94432	1.013898	1.0775914513355351	0.005247424198219143	0.0220688096228191	0.009777458902902601	-6.676324717698059	down
Tβ-MCA	Tauro-β-muricholic acid	Tauro	0.0	0.0	0.0	0.8273739999999999	0.511376	0.571476	1.0345294457863787	0.022376378174150686	0.0412812082538172	Inf	Inf	up
UCA	Ursocholic acid	BAs	2.74828	3.06162	3.5886	448.906	232.922	373.86400000000003	1.0216425935765907	0.03140534587629371	0.042439656589586094	112.32558386976646	6.811542750802133	up
UDCA	Ursodeoxycholic acid	BAs	0.0	0.0	0.0	982.592	523.882	924.398	1.0245031790199717	0.03023533372167645	0.04199351905788396	Inf	Inf	up
α-MCA	α-muricholic acid	BAs	0.0	0.0	0.0	4.0872	2.36052	2.8835	1.0289690954441315	0.025963867872921546	0.0412812082538172	Inf	Inf	up
β-MCA	β-muricholic acid	BAs	0.0	0.0	0.0	6.36092	3.5705199999999997	5.17892	1.033094835182655	0.02482016302896857	0.0412812082538172	Inf	Inf	up
